# Supplementary material for: Genome-Wide Evolutionary Characterization and Expression Analysis of Major Latex Protein (MLP) Family Genes in Tomato
Source: Int J Mol Sci. 2023 Oct 9;24(19):15005. doi: 10.3390/ijms241915005 (PMC10573222; doi:10.3390/ijms241915005)
Supplement: Supplementary file 1 [file ijms-24-15005-s001.zip]

Archive with 11 entries (11 files):
- Figure S1.tiff
- Figure S2.tiff
- Figure S3.tiff
- Figure S4.tiff
- Figure S5.tiff
- Figure S6.tiff
- Supplementary data 1.pdf
- Table S1.xlsx
- Table S2.xlsx
- Table S3.xlsx
- Table S4.xls
