# Supplementary material for: Genome-Wide Evolutionary Characterization and Expression Analysis of Major Latex Protein (MLP) Family Genes in Tomato
Source: Int J Mol Sci. 2023 Oct 9;24(19):15005. doi: 10.3390/ijms241915005 (PMC10573222; doi:10.3390/ijms241915005)
Supplement: Supplementary file 1 [file ijms-24-15005-s001.zip › Table S1.xlsx]

## Sheet: S1
Table S1. List of primers used in this study.
Gene	Forward primer (5'-3')	Reverse primer (5'- 3')	Useage
SlMLP1	AACGAGGAGGCATACACATAC	ATCTGCTGACTGCTCAAACTT	qRT-PCR
SlMLP2	GGAAGCATCAAGACTATCAAT	ACCACCATCTGCTGACTGTTC
SlMLP3	AAAATCGGTTCAGTTGTTAGC	TGTGACTGTCGTCCATTGATA
SlMLP4	TGAGACAATAGAGGTTGGTGC	ATGATGTGATAATAGTGAAGGAA
SlMLP5	AAGGATAAGATTTCAAAGCAA	TCTTCAGTTTTCTTCTCATACAG
SlMLP6	AGAGGAAGTGTTTGAAGCCAT	GAAAACCCAATAGAGCAAGAG
SlMLP7	ATCAACCATTTGGAGATACAC	CGACTCTAACACATCTCCTTC
SlMLP8	GGAAAGTGTTAGAGGGAGATA	TCTGGTGTGTCTTCAGTTTTC
SlMLP9	TGATTGAAGCCGTTGATGAAG	AAGAGTGACGGGTTCTGGTGT
SlMLP10	CTCATCACCTAACAGGAAAGT	CCAAAAGATAACAGAACCAAC
SlMLP11	TACGAAGATGGAAAAGAAATG	TCAGATGATGTAATAACGGTG
SlMLP12	GTGGGAAAGAGATTTTTGTAA	CAACTTGAATAGTGCCATAAA
SlMLP13	CGATGATGGAAAGGAAAAGTT	ACTGTAGTCCACTGGTGTTCA
SlMLP14	TTGAAGGTGATGGCAAGTCTG	ACCAATGTTTTATTTGCCTCA
SlMLP15	AGAAGTGGTGGCAAAGGAGAA	TTATTTTCCCCCTTTGTCTCA
SlMLP16	TATTGGCTCTGTTAGGTTCTG	CCTTCAATCATCTTTTTTTTA
SlMLP17	GGGTGTTACAACTTTTACTGAA	TTACTTGTTCAATACTTCCAGC
SlMLP18	TGAAAAAAGAGTGAAGGGAGTA	AACATCTTTAGTCTCAAAATCAAT
SlMLP19	ATGTTGATGAAGAAGGTGAAA	GATCATCAATAGATTTGGTCATA
SlMLP20	GCCAAACAAGTCCTACACATA	AAGGGCTCTGGAGTATTTTCA
SlMLP21	AAATAAGGTGCTCACACTCAA	CATACTCCAATGTCCAGCAAA
SlMLP22	GATTTGATAACCTGGACATTG	ATCAATACCTTTTGTCATACCA
SlMLP23	TTGTAAAGGTGGTTGTTGATGA	GTTGTTATCTCCTTCATTCTCA
SlMLP24	TTGTAAAGGTGGTTGTTGATGA	GTTGTTATCTCCTTCATTCTCA
SlMLP25	AGAAATGAAGGCTAATAAGGA	ATTTTAGTTCCAACGATTCCA
SlMLP26	CAAAAGTGCTCACATTCAAAG	GCCTTTCATACTCCATTGTCC
SlMLP27	AAGGTGAAGTTGATTTGGTAA	GGTCATACCAATAATAAAGTCCA
SlMLP28	ATGTTGAGACTGAGGGAGATG	ATTTGTCTCCAAGAACATCAC
SlMLP29	AGGTTTGGTTCTTGATTTTGA	TCATTTGCTTGATGCTTCCA
SlMLP30	GACTATTGAGGGAGATGGTGG	TTGTTTCTAAGTTCTTGTCATCA
SlMLP31	ACATTCTCACACACAACATTTT	ACTTGTGGCATCAACTTAGGA
SlMLP32	AATCCACAAATGCTTGCTAAA	CTGACCTTCCTTCTTCCACCT
SlMLP33	AGAGATGAAGTGTGCTGGAGA	TCTTTGCCCCCAAGGATAA
SlMLP34	TGAAGAATGTGAAAATGGAGG	ATAGGCAAAAGGATTAGCAAG
EF-1α（Solyc03g119290）	AAATGTTACCGTGTTGTTCTG	TCGTCTGACCTCCAGTAGCAT
SlMLP1	TTGGAGAGGACACGCTCGAGATGGCTGTCACCACCTTCA	CCCTTGCTCACCATGAATTCAGCATAAGCTTCAGGATTCTGAAG	Subcellular localization
SlMLP3	TTGGAGAGGACACGCTCGAGATGGGTCTCAAGGGCAAG	CCCTTGCTCACCATGAATTCCTTGAGAAGGTGACTTTCAATATCT
SlMLP17	TTGGAGAGGACACGCTCGAGATGGGTGTTACAACTTTTACTGAAGA	CCCTTGCTCACCATGAATTCAGCATAAAGATTTGGATTTTGAATTAAGT
