# Supplementary material for: Genome-Wide Evolutionary Characterization and Expression Analysis of Major Latex Protein (MLP) Family Genes in Tomato
Source: Int J Mol Sci. 2023 Oct 9;24(19):15005. doi: 10.3390/ijms241915005 (PMC10573222; doi:10.3390/ijms241915005)
Supplement: Supplementary file 1 [file ijms-24-15005-s001.zip › Table S2.xlsx]

## Sheet: cis-element analysis
Table S2. Cis-elements of SlMLP gene promoters.
Gene	Location (5')	Location (3')	Cis-element	Sequence	Function	Category
SlMLP1	282	288	CAT-box	GCCACT	Meristem expression	Plant growth and development
SlMLP1	711	720	circadian	CAAAGATATC	Circadian control
SlMLP1	1296	1305	circadian	CAAAGATATC	Circadian control
SlMLP1	147	156	O2-site	GATGACATGG	Zein metabolism regulation
SlMLP1	391	400	O2-site	GATGACATGG	Zein metabolism regulation
SlMLP2	1294	1303	circadian	CAAAGATATC	Circadian control
SlMLP6	1052	1061	circadian	CAAAGATATC	Circadian control
SlMLP6	695	702	GCN4_motif	TGAGTCA	Endosperm expression
SlMLP6	726	733	GCN4_motif	TGAGTCA	Endosperm expression
SlMLP6	609	615	CAT-box	GCCACT	Meristem expression
SlMLP7	22	29	GCN4_motif	TGAGTCA	Endosperm expression
SlMLP7	1183	1189	CCGTCC-box	CCGTCC	Meristem specific activation
SlMLP8	1479	1485	CAT-box	GCCACT	Meristem expression
SlMLP9	1083	1089	CCGTCC-box	CCGTCC	Meristem specific activation
SlMLP10	921	928	GCN4_motif	TGAGTCA	Endosperm expression
SlMLP10	602	611	circadian	CAAAGATATC	Circadian control
SlMLP10	1426	1435	HD-Zip 1	CAAT(A/T)ATTG	Differentiation of the palisade mesophyll cells
SlMLP11	977	986	circadian	CAAAGATATC	Circadian control
SlMLP11	408	414	CCGTCC-box	CCGTCC	Meristem specific activation
SlMLP12	116	125	circadian	CAAAGATATC	Circadian control
SlMLP12	266	272	CAT-box	GCCACT	Meristem expression
SlMLP13	946	955	O2-site	GATGACATGG	Zein metabolism regulation
SlMLP13	1316	1324	RY-element	CATGCATG	Seed specific regulation
SlMLP14	920	926	CAT-box	GCCACT	Meristem expression
SlMLP14	124	133	circadian	CAAAGATATC	Circadian control
SlMLP15	947	954	GCN4_motif	TGAGTCA	Endosperm expression
SlMLP16	205	214	HD-Zip 1	CAAT(A/T)ATTG	Differentiation of the palisade mesophyll cells
SlMLP17	400	409	circadian	CAAAGATATC	Circadian control
SlMLP18	994	1000	CAT-box	GCCACT	Meristem expression
SlMLP19	774	783	O2-site	GATGACATGG	Zein metabolism regulation
SlMLP19	422	428	CCGTCC-box	CCGTCC	Meristem specific activation
SlMLP20	1134	1140	CAT-box	GCCACT	Meristem expression
SlMLP20	104	113	circadian	CAAAGATATC	Circadian control
SlMLP22	1346	1354	RY-element	CATGCATG	Seed specific regulation
SlMLP23	505	511	CCGTCC-box	CCGTCC	Meristem specific activation
SlMLP24	429	435	CCGTCC-box	CCGTCC	Meristem specific activation
SlMLP25	233	242	O2-site	GATGACATGG	Zein metabolism regulation
SlMLP26	850	859	O2-site	GATGACATGG	Zein metabolism regulation
SlMLP27	1246	1252	CAT-box	GCCACT	Meristem expression
SlMLP29	1062	1071	circadian	CAAAGATATC	Circadian control
SlMLP30	956	962	CCGTCC-box	CCGTCC	Meristem specific activation
SlMLP30	170	179	circadian	CAAAGATATC	Circadian control
SlMLP31	91	100	circadian	CAAAGATATC	Circadian control
SlMLP31	95	104	circadian	CAAAGATATC	Circadian control
SlMLP31	103	110	GCN4_motif	TGAGTCA	Endosperm expression
SlMLP32	678	687	circadian	CAAAGATATC	Circadian control
SlMLP34	1406	1413	GCN4_motif	TGAGTCA	Endosperm expression
SlMLP1	770	778	ERE	ATTTCATA	Ethylene-related element	phytohormone responsiveness
SlMLP1	935	943	ERE	ATTTCATA	Ethylene-related element
SlMLP1	367	372	ABRE	ACGTG	Abscisic acid responsiveness
SlMLP1	723	732	TCA-element	CCATCTTTTT	Salicylic acid responsiveness
SlMLP2	526	531	CGTCA-motif	CGTCA	MeJA-responsiveness
SlMLP2	383	389	TGA-element	AACGAC	Auxin-responsive element
SlMLP2	168	173	ABRE	ACGTG	Abscisic acid responsiveness
SlMLP2	848	857	ABRE	ACGTG	Abscisic acid responsiveness
SlMLP2	850	855	ABRE	ACGTG	Abscisic acid responsiveness
SlMLP2	852	861	ABRE	ACGTG	Abscisic acid responsiveness
SlMLP2	855	860	ABRE	ACGTG	Abscisic acid responsiveness
SlMLP2	360	367	GARE-motif	TCTGTTG	Gibberellin-responsive element
SlMLP2	526	531	TGACG-motif	TGACG	MeJA responsiveness
SlMLP3	400	405	ABRE	TACGTGTC	Abscisic acid responsiveness
SlMLP3	305	313	ERE	ATTTCATA	Ethylene-related element
SlMLP3	482	490	ERE	ATTTCATA	Ethylene-related element
SlMLP3	764	772	ERE	ATTTCATA	Ethylene-related element
SlMLP3	777	785	ERE	ATTTCATA	Ethylene-related element
SlMLP3	1259	1267	ERE	ATTTCATA	Ethylene-related element
SlMLP3	729	735	TGA-element	AACGAC	Auxin-responsive element
SlMLP3	1286	1293	AuxRR-core	GGTCCAT	Auxin responsiveness
SlMLP4	1372	1381	TCA-element	CCATCTTTTT	Salicylic acid responsiveness
SlMLP4	293	298	ABRE	ACGTG	Abscisic acid responsiveness
SlMLP4	856	861	ABRE	ACGTG	Abscisic acid responsiveness
SlMLP4	1047	1053	TGA-element	AACGAC	Auxin-responsive element
SlMLP4	1103	1109	TGA-element	AACGAC	Auxin-responsive element
SlMLP4	830	838	ERE	ATTTCATA	Ethylene-related element
SlMLP4	1093	1101	ERE	ATTTCATA	Ethylene-related element
SlMLP4	1274	1282	ERE	ATTTCATA	Ethylene-related element
SlMLP5	1247	1254	TATC-box	TATCCCA	Gibberellin responsiveness
SlMLP5	305	313	ERE	ATTTCATA	Ethylene-related element
SlMLP5	950	958	ERE	ATTTCATA	Ethylene-related element
SlMLP6	1387	1392	CGTCA-motif	CGTCA	MeJA-responsiveness
SlMLP6	1011	1017	TGA-element	AACGAC	Auxin-responsive element
SlMLP6	687	695	ERE	ATTTCATA	Ethylene-related element
SlMLP6	751	758	P-box	CCTTTTG	Gibberellin-responsive element
SlMLP6	1058	1065	TATC-box	TATCCCA	Gibberellin responsiveness
SlMLP6	1387	1392	TGACG-motif	TGACG	MeJA responsiveness
SlMLP7	1215	1220	TGACG-motif	TGACG	MeJA responsiveness
SlMLP7	242	250	ERE	ATTTCATA	Ethylene-related element
SlMLP7	136	141	ABRE	ACGTG	Abscisic acid responsiveness
SlMLP7	1006	1011	ABRE	ACGTG	Abscisic acid responsiveness
SlMLP7	1470	1475	ABRE	ACGTG	Abscisic acid responsiveness
SlMLP7	501	508	P-box	CCTTTTG	Gibberellin-responsive element
SlMLP7	801	810	TCA-element	CCATCTTTTT	Salicylic acid responsiveness
SlMLP7	1195	1204	TCA-element	CCATCTTTTT	Salicylic acid responsiveness
SlMLP7	1215	1220	CGTCA-motif	CGTCA	MeJA-responsiveness
SlMLP8	146	153	GARE-motif	TCTGTTG	Gibberellin-responsive element
SlMLP8	449	457	ERE	ATTTCATA	Ethylene-related element
SlMLP8	1052	1060	ERE	ATTTCATA	Ethylene-related element
SlMLP8	1054	1062	ERE	ATTTCATA	Ethylene-related element
SlMLP8	1233	1238	ABRE	ACGTG	Abscisic acid responsiveness
SlMLP9	1455	1462	AuxRR-core	GGTCCAT	Auxin responsiveness
SlMLP9	1435	1444	TCA-element	CCATCTTTTT	Salicylic acid responsiveness
SlMLP9	454	462	ERE	ATTTCATA	Ethylene-related element
SlMLP9	1236	1244	ERE	ATTTCATA	Ethylene-related element
SlMLP10	22	30	ERE	ATTTCATA	Ethylene-related element
SlMLP10	24	32	ERE	ATTTCATA	Ethylene-related element
SlMLP10	93	101	ERE	ATTTCATA	Ethylene-related element
SlMLP10	342	350	ERE	ATTTCATA	Ethylene-related element
SlMLP11	120	128	ERE	ATTTCATA	Ethylene-related element
SlMLP11	303	309	TGA-element	AACGAC	Auxin-responsive element
SlMLP11	1122	1130	ABRE	ACGTG	Abscisic acid responsiveness
SlMLP11	1124	1129	ABRE	ACGTG	Abscisic acid responsiveness
SlMLP11	1367	1374	ABRE	ACGTG	Abscisic acid responsiveness
SlMLP12	312	321	TCA-element	CCATCTTTTT	Salicylic acid responsiveness
SlMLP12	151	157	TGA-element	AACGAC	Auxin-responsive element
SlMLP12	1045	1053	ERE	ATTTCATA	Ethylene-related element
SlMLP12	219	224	ABRE	ACGTG	Abscisic acid responsiveness
SlMLP12	317	324	GARE-motif	TCTGTTG	Gibberellin-responsive element
SlMLP13	1248	1253	CGTCA-motif	CGTCA	MeJA-responsiveness
SlMLP13	17	24	P-box	CCTTTTG	Gibberellin-responsive element
SlMLP13	1248	1253	TGACG-motif	TGACG	MeJA responsiveness
SlMLP13	582	589	GARE-motif	TCTGTTG	Gibberellin-responsive element
SlMLP14	13	18	TGACG-motif	TGACG	MeJA responsiveness
SlMLP14	1022	1027	TGACG-motif	TGACG	MeJA responsiveness
SlMLP14	1119	1124	TGACG-motif	TGACG	MeJA responsiveness
SlMLP14	11	16	ABRE	ACGTG	Abscisic acid responsiveness
SlMLP14	878	883	ABRE	ACGTG	Abscisic acid responsiveness
SlMLP14	42	50	ERE	ATTTCATA	Ethylene-related element
SlMLP14	260	268	ERE	ATTTCATA	Ethylene-related element
SlMLP14	402	410	ERE	ATTTCATA	Ethylene-related element
SlMLP14	882	890	ERE	ATTTCATA	Ethylene-related element
SlMLP14	13	18	CGTCA-motif	CGTCA	MeJA-responsiveness
SlMLP14	1022	1027	CGTCA-motif	CGTCA	MeJA-responsiveness
SlMLP14	1119	1124	CGTCA-motif	CGTCA	MeJA-responsiveness
SlMLP15	987	994	GARE-motif	TCTGTTG	Gibberellin-responsive element
SlMLP15	1164	1170	TGA-element	AACGAC	Auxin-responsive element
SlMLP15	438	446	ERE	ATTTCATA	Ethylene-related element
SlMLP15	688	696	ERE	ATTTCATA	Ethylene-related element
SlMLP15	117	122	ABRE	ACGTG	Abscisic acid responsiveness
SlMLP16	425	433	ERE	ATTTCATA	Ethylene-related element
SlMLP16	665	674	TCA-element	CCATCTTTTT	Salicylic acid responsiveness
SlMLP16	736	745	TCA-element	CCATCTTTTT	Salicylic acid responsiveness
SlMLP17	252	257	ABRE	ACGTG	Abscisic acid responsiveness
SlMLP17	350	355	ABRE	ACGTG	Abscisic acid responsiveness
SlMLP17	457	464	TATC-box	TATCCCA	Gibberellin responsiveness
SlMLP17	875	882	AuxRR-core	GGTCCAT	Auxin responsiveness
SlMLP18	687	695	ERE	ATTTCATA	Ethylene-related element
SlMLP18	689	697	ERE	ATTTCATA	Ethylene-related element
SlMLP18	1225	1233	ERE	ATTTCATA	Ethylene-related element
SlMLP18	1234	1242	ERE	ATTTCATA	Ethylene-related element
SlMLP18	1202	1207	ABRE	ACGTG	Abscisic acid responsiveness
SlMLP19	1324	1329	CGTCA-motif	CGTCA	MeJA-responsiveness
SlMLP19	566	574	ERE	ATTTCATA	Ethylene-related element
SlMLP19	602	610	ERE	ATTTCATA	Ethylene-related element
SlMLP19	1260	1268	ERE	ATTTCATA	Ethylene-related element
SlMLP19	1033	1038	ABRE	ACGTG	Abscisic acid responsiveness
SlMLP19	1324	1329	TGACG-motif	TGACG	MeJA responsiveness
SlMLP20	78	87	TCA-element	CCATCTTTTT	Salicylic acid responsiveness
SlMLP20	1216	1224	ERE	ATTTCATA	Ethylene-related element
SlMLP20	1415	1422	AuxRR-core	GGTCCAT	Auxin responsiveness
SlMLP21	1317	1322	CGTCA-motif	CGTCA	MeJA-responsiveness
SlMLP21	51	56	ABRE	ACGTG	Abscisic acid responsiveness
SlMLP21	906	915	ABRE	ACGTG	Abscisic acid responsiveness
SlMLP21	244	252	ERE	ATTTCATA	Ethylene-related element
SlMLP21	1290	1298	ERE	ATTTCATA	Ethylene-related element
SlMLP21	1428	1436	ERE	ATTTCATA	Ethylene-related element
SlMLP21	1317	1322	TGACG-motif	TGACG	MeJA responsiveness
SlMLP22	1385	1393	ERE	ATTTCATA	Ethylene-related element
SlMLP22	199	205	TGA-element	AACGAC	Auxin-responsive element
SlMLP22	1323	1332	ABRE	ACGTG	Abscisic acid responsiveness
SlMLP22	1022	1031	TCA-element	CCATCTTTTT	Salicylic acid responsiveness
SlMLP23	551	559	ERE	ATTTCATA	Ethylene-related element
SlMLP23	553	561	ERE	ATTTCATA	Ethylene-related element
SlMLP23	568	576	ERE	ATTTCATA	Ethylene-related element
SlMLP23	806	814	ERE	ATTTCATA	Ethylene-related element
SlMLP23	1147	1155	ERE	ATTTCATA	Ethylene-related element
SlMLP23	1369	1374	ABRE	ACGTG	Abscisic acid responsiveness
SlMLP24	1300	1305	ABRE	ACGTG	Abscisic acid responsiveness
SlMLP24	475	483	ERE	ATTTCATA	Ethylene-related element
SlMLP24	477	485	ERE	ATTTCATA	Ethylene-related element
SlMLP24	492	500	ERE	ATTTCATA	Ethylene-related element
SlMLP24	730	738	ERE	ATTTCATA	Ethylene-related element
SlMLP24	1075	1083	ERE	ATTTCATA	Ethylene-related element
SlMLP25	228	237	TCA-element	CCATCTTTTT	Salicylic acid responsiveness
SlMLP25	43	51	ERE	ATTTCATA	Ethylene-related element
SlMLP25	389	397	ERE	ATTTCATA	Ethylene-related element
SlMLP25	773	781	ERE	ATTTCATA	Ethylene-related element
SlMLP25	848	856	ERE	ATTTCATA	Ethylene-related element
SlMLP25	866	874	ERE	ATTTCATA	Ethylene-related element
SlMLP25	1331	1339	ERE	ATTTCATA	Ethylene-related element
SlMLP25	840	847	ABRE	ACGTG	Abscisic acid responsiveness
SlMLP26	304	309	CGTCA-motif	CGTCA	MeJA-responsiveness
SlMLP26	852	857	CGTCA-motif	CGTCA	MeJA-responsiveness
SlMLP26	335	344	TCA-element	CCATCTTTTT	Salicylic acid responsiveness
SlMLP26	226	234	ERE	ATTTCATA	Ethylene-related element
SlMLP26	666	674	ERE	ATTTCATA	Ethylene-related element
SlMLP26	1183	1191	ERE	ATTTCATA	Ethylene-related element
SlMLP26	284	289	ABRE	ACGTG	Abscisic acid responsiveness
SlMLP26	787	795	ABRE	ACGTG	Abscisic acid responsiveness
SlMLP26	788	793	ABRE	ACGTG	Abscisic acid responsiveness
SlMLP26	1163	1169	ABRE	ACGTG	Abscisic acid responsiveness
SlMLP26	1164	1169	ABRE	ACGTG	Abscisic acid responsiveness
SlMLP26	304	309	TGACG-motif	TGACG	MeJA responsiveness
SlMLP26	852	857	TGACG-motif	TGACG	MeJA responsiveness
SlMLP27	952	957	ABRE	ACGTG	Abscisic acid responsiveness
SlMLP27	343	348	TGACG-motif	TGACG	MeJA responsiveness
SlMLP27	825	830	TGACG-motif	TGACG	MeJA responsiveness
SlMLP27	1421	1430	TCA-element	CCATCTTTTT	Salicylic acid responsiveness
SlMLP27	343	348	CGTCA-motif	CGTCA	MeJA-responsiveness
SlMLP27	825	830	CGTCA-motif	CGTCA	MeJA-responsiveness
SlMLP28	726	731	TGACG-motif	TGACG	MeJA responsiveness
SlMLP28	216	224	ERE	ATTTCATA	Ethylene-related element
SlMLP28	1005	1013	ERE	ATTTCATA	Ethylene-related element
SlMLP28	53	59	TGA-element	AACGAC	Auxin-responsive element
SlMLP28	43	49	ABRE	ACGTG	Abscisic acid responsiveness
SlMLP28	44	49	ABRE	ACGTG	Abscisic acid responsiveness
SlMLP28	726	731	CGTCA-motif	CGTCA	MeJA-responsiveness
SlMLP29	1209	1214	TGACG-motif	TGACG	MeJA responsiveness
SlMLP29	1209	1214	CGTCA-motif	CGTCA	MeJA-responsiveness
SlMLP30	195	200	CGTCA-motif	CGTCA	MeJA-responsiveness
SlMLP30	1155	1160	CGTCA-motif	CGTCA	MeJA-responsiveness
SlMLP30	195	200	TGACG-motif	TGACG	MeJA responsiveness
SlMLP30	1155	1160	TGACG-motif	TGACG	MeJA responsiveness
SlMLP30	1442	1449	P-box	CCTTTTG	Gibberellin-responsive element
SlMLP30	275	281	TGA-element	AACGAC	Auxin-responsive element
SlMLP30	12	20	ERE	ATTTCATA	Ethylene-related element
SlMLP30	1119	1127	ERE	ATTTCATA	Ethylene-related element
SlMLP31	414	419	CGTCA-motif	CGTCA	MeJA-responsiveness
SlMLP31	1214	1219	CGTCA-motif	CGTCA	MeJA-responsiveness
SlMLP31	414	419	TGACG-motif	TGACG	MeJA responsiveness
SlMLP31	1214	1219	TGACG-motif	TGACG	MeJA responsiveness
SlMLP31	141	146	ABRE	ACGTG	Abscisic acid responsiveness
SlMLP31	231	239	ERE	ATTTCATA	Ethylene-related element
SlMLP31	249	257	ERE	ATTTCATA	Ethylene-related element
SlMLP32	33	38	CGTCA-motif	CGTCA	MeJA-responsiveness
SlMLP32	33	38	TGACG-motif	TGACG	MeJA responsiveness
SlMLP32	311	316	ABRE	ACGTG	Abscisic acid responsiveness
SlMLP32	992	997	ABRE	ACGTG	Abscisic acid responsiveness
SlMLP32	1400	1407	ABRE	ACGTG	Abscisic acid responsiveness
SlMLP33	616	621	CGTCA-motif	CGTCA	MeJA-responsiveness
SlMLP33	153	161	ERE	ATTTCATA	Ethylene-related element
SlMLP33	680	688	ERE	ATTTCATA	Ethylene-related element
SlMLP33	616	621	TGACG-motif	TGACG	MeJA responsiveness
SlMLP34	813	821	ERE	ATTTCATA	Ethylene-related element
SlMLP34	1431	1440	TCA-element	CCATCTTTTT	Salicylic acid responsiveness
SlMLP1	301	306	STRE	AGGGG	Stress-responsive element	Stress responsiveness
SlMLP1	127	133	ARE	AAACCA	Anaerobic induction
SlMLP1	959	965	MBS	CAACTG	Drought inducibility
SlMLP1	1315	1324	WUN-motif	AAATTTCTT	Wound-responsive element
SlMLP1	1316	1324	WUN-motif	AAATTTCTT	Wound-responsive element
SlMLP1	352	358	LTR	CCGAAA	Low-temperature responsiveness
SlMLP2	141	147	WRE3	CCACCT	Wound-responsive element
SlMLP2	337	343	MBS	CAACTG	Drought inducibility
SlMLP2	965	971	MBS	CAACTG	Drought inducibility
SlMLP2	1125	1131	MBS	CAACTG	Drought inducibility
SlMLP2	636	645	WUN-motif	AAATTTCTT	Wound-responsive element
SlMLP2	1417	1426	WUN-motif	AAATTTCTT	Wound-responsive element
SlMLP2	1265	1271	ARE	AAACCA	Anaerobic induction
SlMLP2	1318	1324	ARE	AAACCA	Anaerobic induction
SlMLP2	1168	1173	STRE	AGGGG	Stress-responsive element
SlMLP2	1451	1456	STRE	AGGGG	Stress-responsive element
SlMLP3	1009	1015	ARE	AAACCA	Anaerobic induction
SlMLP3	852	861	WUN-motif	AAATTTCTT	Wound-responsive element
SlMLP4	1449	1455	LTR	CCGAAA	Low-temperature responsiveness
SlMLP4	113	121	WUN-motif	AAATTTCTT	Wound-responsive element
SlMLP4	752	760	WUN-motif	AAATTTCTT	Wound-responsive element
SlMLP4	1265	1274	WUN-motif	AAATTTCTT	Wound-responsive element
SlMLP4	1287	1295	WUN-motif	AAATTTCTT	Wound-responsive element
SlMLP4	4	9	STRE	AGGGG	Stress-responsive element
SlMLP5	235	241	LTR	CCGAAA	Low-temperature responsiveness
SlMLP5	980	986	ARE	AAACCA	Anaerobic induction
SlMLP5	703	708	STRE	AGGGG	Stress-responsive element
SlMLP6	577	583	ARE	AAACCA	Anaerobic induction
SlMLP6	412	421	WUN-motif	AAATTTCTT	Wound-responsive element
SlMLP6	413	421	WUN-motif	AAATTTCTT	Wound-responsive element
SlMLP6	191	196	STRE	AGGGG	Stress-responsive element
SlMLP6	739	744	STRE	AGGGG	Stress-responsive element
SlMLP7	660	669	TC-rich repeats	ATTCTCTAAC	Defense and stress responsiveness
SlMLP7	386	392	ARE	AAACCA	Anaerobic induction
SlMLP7	489	495	ARE	AAACCA	Anaerobic induction
SlMLP7	655	661	LTR	CCGAAA	Low-temperature responsiveness
SlMLP8	1104	1109	STRE	AGGGG	Stress-responsive element
SlMLP8	813	821	WUN-motif	AAATTTCTT	Wound-responsive element
SlMLP8	1183	1192	WUN-motif	AAATTTCTT	Wound-responsive element
SlMLP9	866	875	WUN-motif	AAATTTCTT	Wound-responsive element
SlMLP9	87	93	ARE	AAACCA	Anaerobic induction
SlMLP9	700	706	ARE	AAACCA	Anaerobic induction
SlMLP9	242	251	TC-rich repeats	ATTCTCTAAC	Defense and stress responsiveness
SlMLP10	538	547	WUN-motif	AAATTTCTT	Wound-responsive element
SlMLP10	539	547	WUN-motif	AAATTTCTT	Wound-responsive element
SlMLP10	591	597	ARE	AAACCA	Anaerobic induction
SlMLP10	1193	1198	STRE	AGGGG	Stress-responsive element
SlMLP10	1281	1286	STRE	AGGGG	Stress-responsive element
SlMLP10	1020	1026	LTR	CCGAAA	Low-temperature responsiveness
SlMLP10	1363	1369	LTR	CCGAAA	Low-temperature responsiveness
SlMLP11	1305	1311	LTR	CCGAAA	Low-temperature responsiveness
SlMLP11	166	171	STRE	AGGGG	Stress-responsive element
SlMLP11	483	488	STRE	AGGGG	Stress-responsive element
SlMLP11	405	411	GC-motif	CCCCCG	Anoxic specific inducibility
SlMLP11	909	915	ARE	AAACCA	Anaerobic induction
SlMLP11	914	920	ARE	AAACCA	Anaerobic induction
SlMLP12	1184	1190	LTR	CCGAAA	Low-temperature responsiveness
SlMLP12	203	209	MBS	CAACTG	Drought inducibility
SlMLP12	1069	1075	MBS	CAACTG	Drought inducibility
SlMLP12	372	377	STRE	AGGGG	Stress-responsive element
SlMLP12	510	515	STRE	AGGGG	Stress-responsive element
SlMLP12	518	523	STRE	AGGGG	Stress-responsive element
SlMLP12	624	629	STRE	AGGGG	Stress-responsive element
SlMLP12	1102	1107	STRE	AGGGG	Stress-responsive element
SlMLP13	937	946	WUN-motif	AAATTTCTT	Wound-responsive element
SlMLP13	369	375	MBS	CAACTG	Drought inducibility
SlMLP13	569	575	ARE	AAACCA	Anaerobic induction
SlMLP13	873	882	TC-rich repeats	GTTTTCTTAC	Defense and stress responsiveness
SlMLP13	640	645	STRE	AGGGG	Stress-responsive element
SlMLP13	702	707	STRE	AGGGG	Stress-responsive element
SlMLP14	1322	1331	TC-rich repeats	GTTTTCTTAC	Defense and stress responsiveness
SlMLP14	68	77	WUN-motif	AAATTTCTT	Wound-responsive element
SlMLP14	446	455	WUN-motif	AAATTTCTT	Wound-responsive element
SlMLP14	447	455	WUN-motif	AAATTTCTT	Wound-responsive element
SlMLP14	549	557	WUN-motif	AAATTTCTT	Wound-responsive element
SlMLP15	1127	1132	STRE	AGGGG	Stress-responsive element
SlMLP15	1226	1231	STRE	AGGGG	Stress-responsive element
SlMLP15	1476	1485	TC-rich repeats	GTTTTCTTAC	Defense and stress responsiveness
SlMLP16	559	568	TC-rich repeats	GTTTTCTTAC	Defense and stress responsiveness
SlMLP16	843	849	ARE	AAACCA	Anaerobic induction
SlMLP16	946	952	MBS	CAACTG	Drought inducibility
SlMLP16	277	286	WUN-motif	AAATTTCTT	Wound-responsive element
SlMLP16	722	731	WUN-motif	AAATTTCTT	Wound-responsive element
SlMLP16	334	340	LTR	CCGAAA	Low-temperature responsiveness
SlMLP16	478	484	LTR	CCGAAA	Low-temperature responsiveness
SlMLP17	441	447	ARE	AAACCA	Anaerobic induction
SlMLP17	640	646	ARE	AAACCA	Anaerobic induction
SlMLP17	240	248	WUN-motif	AAATTTCTT	Wound-responsive element
SlMLP17	1032	1041	WUN-motif	AAATTTCTT	Wound-responsive element
SlMLP17	198	203	STRE	AGGGG	Stress-responsive element
SlMLP18	828	834	MBS	CAACTG	Drought inducibility
SlMLP18	660	669	WUN-motif	AAATTTCTT	Wound-responsive element
SlMLP18	661	669	WUN-motif	AAATTTCTT	Wound-responsive element
SlMLP18	958	967	WUN-motif	AAATTTCTT	Wound-responsive element
SlMLP18	1292	1300	WUN-motif	AAATTTCTT	Wound-responsive element
SlMLP18	1299	1305	ARE	AAACCA	Anaerobic induction
SlMLP18	1425	1431	ARE	AAACCA	Anaerobic induction
SlMLP19	164	173	WUN-motif	AAATTTCTT	Wound-responsive element
SlMLP19	853	862	WUN-motif	AAATTTCTT	Wound-responsive element
SlMLP19	1328	1333	STRE	AGGGG	Stress-responsive element
SlMLP19	1472	1477	STRE	AGGGG	Stress-responsive element
SlMLP20	1063	1069	WRE3	CCACCT	Wound-responsive element
SlMLP20	1	6	STRE	AGGGG	Stress-responsive element
SlMLP20	1420	1425	STRE	AGGGG	Stress-responsive element
SlMLP20	728	734	ARE	AAACCA	Anaerobic induction
SlMLP20	623	629	GC-motif	CCCCCG	Anoxic specific inducibility
SlMLP21	74	83	WUN-motif	AAATTTCTT	Wound-responsive element
SlMLP21	1057	1063	MBS	CAACTG	Drought inducibility
SlMLP21	96	101	STRE	AGGGG	Stress-responsive element
SlMLP21	1453	1458	STRE	AGGGG	Stress-responsive element
SlMLP21	1464	1469	STRE	AGGGG	Stress-responsive element
SlMLP22	1449	1454	STRE	AGGGG	Stress-responsive element
SlMLP22	1460	1465	STRE	AGGGG	Stress-responsive element
SlMLP25	1306	1312	ARE	AAACCA	Anaerobic induction
SlMLP25	625	634	WUN-motif	AAATTTCTT	Wound-responsive element
SlMLP25	737	746	WUN-motif	AAATTTCTT	Wound-responsive element
SlMLP25	244	253	TC-rich repeats	GTTTTCTTAC	Defense and stress responsiveness
SlMLP25	1214	1223	TC-rich repeats	GTTTTCTTAC	Defense and stress responsiveness
SlMLP25	161	166	STRE	AGGGG	Stress-responsive element
SlMLP25	1131	1136	STRE	AGGGG	Stress-responsive element
SlMLP25	1456	1461	STRE	AGGGG	Stress-responsive element
SlMLP25	1464	1469	STRE	AGGGG	Stress-responsive element
SlMLP26	323	329	LTR	CCGAAA	Low-temperature responsiveness
SlMLP26	173	179	ARE	AAACCA	Anaerobic induction
SlMLP26	292	298	MBS	CAACTG	Drought inducibility
SlMLP26	153	158	STRE	AGGGG	Stress-responsive element
SlMLP26	827	832	STRE	AGGGG	Stress-responsive element
SlMLP26	1451	1456	STRE	AGGGG	Stress-responsive element
SlMLP27	1272	1281	WUN-motif	AAATTTCTT	Wound-responsive element
SlMLP27	649	655	ARE	AAACCA	Anaerobic induction
SlMLP27	1260	1266	ARE	AAACCA	Anaerobic induction
SlMLP27	152	157	STRE	AGGGG	Stress-responsive element
SlMLP27	1453	1458	STRE	AGGGG	Stress-responsive element
SlMLP27	1459	1464	STRE	AGGGG	Stress-responsive element
SlMLP27	182	191	TC-rich repeats	GTTTTCTTAC	Defense and stress responsiveness
SlMLP27	988	997	TC-rich repeats	GTTTTCTTAC	Defense and stress responsiveness
SlMLP27	1067	1076	TC-rich repeats	GTTTTCTTAC	Defense and stress responsiveness
SlMLP27	1050	1056	LTR	CCGAAA	Low-temperature responsiveness
SlMLP28	1220	1229	TC-rich repeats	GTTTTCTTAC	Defense and stress responsiveness
SlMLP28	61	67	ARE	AAACCA	Anaerobic induction
SlMLP28	95	101	WRE3	CCACCT	Wound-responsive element
SlMLP29	1301	1310	WUN-motif	AAATTTCTT	Wound-responsive element
SlMLP30	21	30	TC-rich repeats	GTTTTCTTAC	Defense and stress responsiveness
SlMLP30	974	983	TC-rich repeats	GTTTTCTTAC	Defense and stress responsiveness
SlMLP30	458	467	WUN-motif	AAATTTCTT	Wound-responsive element
SlMLP30	152	158	ARE	AAACCA	Anaerobic induction
SlMLP31	303	309	LTR	CCGAAA	Low-temperature responsiveness
SlMLP31	284	290	WRE3	CCACCT	Wound-responsive element
SlMLP31	171	176	STRE	AGGGG	Stress-responsive element
SlMLP31	1317	1326	TC-rich repeats	GTTTTCTTAC	Defense and stress responsiveness
SlMLP31	835	841	ARE	AAACCA	Anaerobic induction
SlMLP31	1298	1304	ARE	AAACCA	Anaerobic induction
SlMLP31	1198	1206	WUN-motif	AAATTTCTT	Wound-responsive element
SlMLP32	331	341	TC-rich repeats	GTTTTCTTAC	Defense and stress responsiveness
SlMLP32	29	35	MBS	CAACTG	Drought inducibility
SlMLP32	250	256	MBS	CAACTG	Drought inducibility
SlMLP33	1423	1429	WRE3	CCACCT	Wound-responsive element
SlMLP33	179	185	ARE	AAACCA	Anaerobic induction
SlMLP33	1291	1297	ARE	AAACCA	Anaerobic induction
SlMLP33	499	508	WUN-motif	AAATTTCTT	Wound-responsive element
SlMLP33	548	557	WUN-motif	AAATTTCTT	Wound-responsive element
SlMLP33	1395	1401	MBS	CAACTG	Drought inducibility
SlMLP34	1086	1091	STRE	AGGGG	Stress-responsive element
SlMLP34	592	598	LTR	CCGAAA	Low-temperature responsiveness
SlMLP34	626	632	LTR	CCGAAA	Low-temperature responsiveness
SlMLP34	719	725	LTR	CCGAAA	Low-temperature responsiveness
SlMLP34	961	967	LTR	CCGAAA	Low-temperature responsiveness
SlMLP34	1036	1042	LTR	CCGAAA	Low-temperature responsiveness
SlMLP34	317	323	ARE	AAACCA	Anaerobic induction
SlMLP34	326	332	ARE	AAACCA	Anaerobic induction
SlMLP34	429	435	ARE	AAACCA	Anaerobic induction
SlMLP34	1064	1070	ARE	AAACCA	Anaerobic induction
SlMLP34	1291	1300	WUN-motif	AAATTTCTT	Wound-responsive element
SlMLP1	366	372	G-box	TACGTG		Light responsiveness
SlMLP1	764	771	GT1-motif	GGTTAAT
SlMLP2	775	782	GT1-motif	GGTTAAT
SlMLP2	1211	1217	Box 4	ATTAAT
SlMLP2	656	663	MRE	AACCTAA
SlMLP2	168	174	G-Box	TACGTG
SlMLP2	850	856	G-box	TACGTG
SlMLP2	854	860	G-box	TACGTG
SlMLP3	407	413	Box 4	ATTAAT
SlMLP3	465	471	Box 4	ATTAAT
SlMLP3	544	550	Box 4	ATTAAT
SlMLP3	719	725	Box 4	ATTAAT
SlMLP3	910	916	Box 4	ATTAAT
SlMLP3	927	933	Box 4	ATTAAT
SlMLP3	980	986	Box 4	ATTAAT
SlMLP3	1079	1085	Box 4	ATTAAT
SlMLP3	399	405	G-Box	TACGTG
SlMLP4	609	615	GT1-motif	GGTTAAT
SlMLP4	649	655	GT1-motif	GGTTAAT
SlMLP4	1260	1266	GT1-motif	GGTTAAT
SlMLP4	133	139	Box 4	ATTAAT
SlMLP4	181	187	Box 4	ATTAAT
SlMLP4	299	305	Box 4	ATTAAT
SlMLP4	373	379	Box 4	ATTAAT
SlMLP4	513	519	Box 4	ATTAAT
SlMLP4	525	531	Box 4	ATTAAT
SlMLP4	856	862	G-Box	TACGTG
SlMLP4	293	299	G-box	TACGTG
SlMLP4	1413	1419	G-box	TACGTG
SlMLP5	1032	1038	GT1-motif	GGTTAAT
SlMLP5	1375	1381	GT1-motif	GGTTAAT
SlMLP5	493	499	Box 4	ATTAAT
SlMLP5	792	798	G-box	TACGTG
SlMLP6	493	499	Box 4	ATTAAT
SlMLP6	507	513	Box 4	ATTAAT
SlMLP6	929	935	Box 4	ATTAAT
SlMLP6	933	939	Box 4	ATTAAT
SlMLP6	630	636	G-box	TACGTG
SlMLP7	136	142	G-box	TACGTG
SlMLP7	1006	1012	G-box	TACGTG
SlMLP7	1470	1476	G-box	TACGTG
SlMLP8	1155	1162	MRE	AACCTAA
SlMLP8	683	689	Box 4	ATTAAT
SlMLP8	1066	1072	Box 4	ATTAAT
SlMLP8	1283	1289	Box 4	ATTAAT
SlMLP8	31	40	G-box	TACGTG
SlMLP8	1233	1239	G-box	TACGTG
SlMLP9	871	877	Box 4	ATTAAT
SlMLP9	1005	1011	Box 4	ATTAAT
SlMLP9	1249	1255	Box 4	ATTAAT
SlMLP9	1487	1493	Box 4	ATTAAT
SlMLP9	1409	1416	MRE	AACCTAA
SlMLP11	1472	1479	MRE	AACCTAA
SlMLP11	250	256	GT1-motif	GGTTAAT
SlMLP11	1124	1130	G-box	TACGTG
SlMLP11	480	486	Sp1	GGGCGG
SlMLP12	859	866	GT1-motif	GGTTAAT
SlMLP12	1287	1293	GT1-motif	GGTTAAT
SlMLP12	1289	1296	MRE	AACCTAA
SlMLP12	405	411	Box 4	ATTAAT
SlMLP12	1332	1338	Box 4	ATTAAT
SlMLP12	219	225	G-box	TACGTG
SlMLP13	1167	1174	GT1-motif	GGTTAAT
SlMLP13	1168	1174	GT1-motif	GGTTAAT
SlMLP13	1176	1183	GT1-motif	GGTTAAT
SlMLP13	1177	1183	GT1-motif	GGTTAAT
SlMLP13	1036	1042	Box 4	ATTAAT
SlMLP13	1307	1313	Box 4	ATTAAT
SlMLP13	1012	1019	MRE	AACCTAA
SlMLP13	679	685	Sp1	GGGCGG
SlMLP14	11	17	G-box	TACGTG
SlMLP14	878	886	G-box	TACGTG
SlMLP14	878	884	G-Box	TACGTG
SlMLP14	176	183	MRE	AACCTAA
SlMLP14	439	445	Box 4	ATTAAT
SlMLP14	772	778	Box 4	ATTAAT
SlMLP14	974	980	Box 4	ATTAAT
SlMLP14	1442	1448	Box 4	ATTAAT
SlMLP15	542	548	Box 4	ATTAAT
SlMLP15	998	1004	Box 4	ATTAAT
SlMLP15	117	123	G-Box	TACGTG
SlMLP16	38	44	Box 4	ATTAAT
SlMLP16	194	200	Box 4	ATTAAT
SlMLP16	1315	1321	GT1-motif	GGTTAAT
SlMLP17	1395	1401	Sp1	GGGCGG
SlMLP17	251	257	G-box	TACGTG
SlMLP17	350	356	G-box	TACGTG
SlMLP17	607	613	GT1-motif	GGTTAAT
SlMLP17	1233	1239	GT1-motif	GGTTAAT
SlMLP17	75	81	Box 4	ATTAAT
SlMLP17	161	167	Box 4	ATTAAT
SlMLP17	576	582	Box 4	ATTAAT
SlMLP17	721	727	Box 4	ATTAAT
SlMLP17	839	845	Box 4	ATTAAT
SlMLP17	864	870	Box 4	ATTAAT
SlMLP17	1142	1148	Box 4	ATTAAT
SlMLP17	1482	1488	Box 4	ATTAAT
SlMLP18	110	116	Box 4	ATTAAT
SlMLP18	273	279	Box 4	ATTAAT
SlMLP18	422	428	Box 4	ATTAAT
SlMLP18	588	594	Box 4	ATTAAT
SlMLP18	1165	1171	Box 4	ATTAAT
SlMLP18	513	520	MRE	AACCTAA
SlMLP18	1200	1209	ACE	GACACGTATG
SlMLP18	1199	1209	G-box	TACGTG
SlMLP18	1202	1208	G-box	TACGTG
SlMLP19	1398	1405	GT1-motif	GGTTAAT
SlMLP19	1089	1096	MRE	AACCTAA
SlMLP19	5	11	Box 4	ATTAAT
SlMLP19	500	506	Box 4	ATTAAT
SlMLP19	579	585	Box 4	ATTAAT
SlMLP19	608	614	Box 4	ATTAAT
SlMLP19	717	723	Box 4	ATTAAT
SlMLP19	760	766	Box 4	ATTAAT
SlMLP19	1033	1039	G-Box	TACGTG
SlMLP19	803	809	G-box	TACGTG
SlMLP20	294	300	Box 4	ATTAAT
SlMLP20	885	891	Box 4	ATTAAT
SlMLP21	1209	1216	GT1-motif	GGTTAAT
SlMLP21	787	793	Box 4	ATTAAT
SlMLP21	1084	1090	Box 4	ATTAAT
SlMLP21	51	57	G-box	TACGTG
SlMLP22	940	946	Box 4	ATTAAT
SlMLP22	1255	1261	Box 4	ATTAAT
SlMLP23	492	498	Box 4	ATTAAT
SlMLP23	1230	1236	Box 4	ATTAAT
SlMLP23	1400	1406	Box 4	ATTAAT
SlMLP23	1369	1375	G-box	TACGTG
SlMLP24	416	422	Box 4	ATTAAT
SlMLP24	1331	1337	Box 4	ATTAAT
SlMLP24	1300	1306	G-box	TACGTG
SlMLP25	1046	1052	GT1-motif	GGTTAAT
SlMLP26	564	570	GT1-motif	GGTTAAT
SlMLP26	785	794	ACE	GACACGTATG
SlMLP26	656	662	Box 4	ATTAAT
SlMLP26	1163	1169	G-Box	TACGTG
SlMLP26	284	290	G-box	TACGTG
SlMLP26	787	793	G-box	TACGTG
SlMLP26	1161	1170	G-box	TACGTG
SlMLP26	1163	1169	G-box	TACGTG
SlMLP27	952	958	G-Box	TACGTG
SlMLP27	215	221	GT1-motif	GGTTAAT
SlMLP27	638	644	GT1-motif	GGTTAAT
SlMLP27	505	512	MRE	AACCTAA
SlMLP28	43	49	G-box	TACGTG
SlMLP28	43	49	G-Box	TACGTG
SlMLP28	971	978	MRE	AACCTAA
SlMLP28	1012	1019	MRE	AACCTAA
SlMLP28	75	81	Box 4	ATTAAT
SlMLP28	266	272	Box 4	ATTAAT
SlMLP28	413	419	Box 4	ATTAAT
SlMLP28	709	715	Box 4	ATTAAT
SlMLP28	791	797	Box 4	ATTAAT
SlMLP28	1193	1199	Box 4	ATTAAT
SlMLP29	17	23	Box 4	ATTAAT
SlMLP29	121	127	Box 4	ATTAAT
SlMLP29	149	155	Box 4	ATTAAT
SlMLP29	427	433	Box 4	ATTAAT
SlMLP29	770	776	Box 4	ATTAAT
SlMLP29	863	869	Box 4	ATTAAT
SlMLP30	967	973	Box 4	ATTAAT
SlMLP30	1239	1245	Box 4	ATTAAT
SlMLP30	675	688	4cl-CMA2b	TCTCACCAACCCCA
SlMLP31	83	89	Box 4	ATTAAT
SlMLP31	348	354	Box 4	ATTAAT
SlMLP31	791	797	Box 4	ATTAAT
SlMLP31	886	892	Box 4	ATTAAT
SlMLP31	1128	1134	Box 4	ATTAAT
SlMLP31	1272	1278	Box 4	ATTAAT
SlMLP31	1348	1354	Box 4	ATTAAT
SlMLP31	1451	1457	Box 4	ATTAAT
SlMLP31	706	712	GT1-motif	GGTTAAT
SlMLP31	949	956	GT1-motif	GGTTAAT
SlMLP31	950	956	GT1-motif	GGTTAAT
SlMLP31	141	147	G-box	TACGTG
SlMLP32	1077	1083	Box 4	ATTAAT
SlMLP32	1238	1244	Box 4	ATTAAT
SlMLP32	1364	1370	Box 4	ATTAAT
SlMLP32	1170	1177	MRE	AACCTAA
SlMLP32	1168	1174	GT1-motif	GGTTAAT
SlMLP32	310	316	G-box	TACGTG
SlMLP32	991	997	G-Box	TACGTG
SlMLP33	647	654	MRE	AACCTAA
SlMLP33	941	947	Box 4	ATTAAT
SlMLP33	781	787	G-box	TACGTG
SlMLP34	779	785	Box 4	ATTAAT
SlMLP34	786	792	Box 4	ATTAAT
SlMLP34	1460	1466	Box 4	ATTAAT
SlMLP34	144	151	GT1-motif	GGTTAAT
SlMLP34	388	394	GT1-motif	GGTTAAT
SlMLP34	1172	1178	GT1-motif	GGTTAAT
