# Supplementary material for: Genome-Wide Evolutionary Characterization and Expression Analysis of Major Latex Protein (MLP) Family Genes in Tomato
Source: Int J Mol Sci. 2023 Oct 9;24(19):15005. doi: 10.3390/ijms241915005 (PMC10573222; doi:10.3390/ijms241915005)
Supplement: Supplementary file 1 [file ijms-24-15005-s001.zip › Table S3.xlsx]

## Sheet: S3
Table S3. Syntenic MLP gene pairs between tomato and other species.
Tomato-Apple		Tomato-Cucumber		Tomato-Arabidopsis
Tomato gene	Apple gene	Tomato gene	Cucumber gene	Tomato gene	Arabidopsis gene
SlMLP14 (Solyc05g005865)	MdMLP7 (MD13G1088200)	SlMLP14 (Solyc05g005865)	CsMLP37(CsaV3_5G031770)	SlMLP14 (Solyc05g005865)	AT1G24020
SlMLP14 (Solyc05g005865)	MdMLP22(MD16G1088600)
SlMLP10 (Solyc04g150104)MdMLP4(MD13G1022700)	MdMLP4 (MD13G1022700)
