# Supplementary material for: Genome-Wide Evolutionary Characterization and Expression Analysis of Major Latex Protein (MLP) Family Genes in Tomato
Source: Int J Mol Sci. 2023 Oct 9;24(19):15005. doi: 10.3390/ijms241915005 (PMC10573222; doi:10.3390/ijms241915005)
Supplement: Supplementary file 1 [file ijms-24-15005-s001.zip › Table S4.xls]

## Sheet: Sheet1
Table S4.Motif of MLPs in tomato
Motif name	Motif Sequence	Motif logo	Length	E-value
Motif 1	GLKGKLIASIEIKCGGDVFHDIFRTKPHHISNISPDKIQNFEJHEGELGTVGSVISW		57	8.4E-626
Motif 2	BLVTWTLEYEKKNEBVPEPLT		21	1.8e-232
Motif 3	DEEKKVITFKVIEGDLLELYN		21	4.1e-201
Motif 4	MGVTTYTHESTSPIPPTRJFKALVLDSDNLIPKLMP		36	1.5e-110
Motif 5	YTLDGKEKVAKZVIE		15	7.7e-91
Motif 6	LEFVIGVTKDIEDHH		15	1.5e-76
Motif 7	AGBGGCICKTTTEYHTKGDFVLKEEEINE		29	1.9e-63
Motif 8	GDGSIKKMNFVEGGPIKYLKHKIH		24	4.6e-43
Motif 9	FKATLHIETKG		11	1.3e-34
Motif 10	ESITYDVKFEA		11	6.6e-11
